# Supplementary material for: Review article: Emergency Response Automation (ERA) as a Safety-Critical System: A Systematic Review of Reliability, Architecture, and Evolution (2010–2025)
Source: Copernicus journal article supplement (doi:10.5194/egusphere-2025-5776), 2026-01-12
Supplement: Supplementary file [file egusphere-2025-5776-AC2-supplement.pdf]

14        Response to Referee #2

15        Dear Editor and Referee,

16        We would like to express our sincere gratitude to the referee for the time and effort  
17 dedicated to evaluating our manuscript during the open discussion phase. The constructive  
18 feedback and insightful comments provided have been incredibly valuable in identifying  
19 areas for improvement and enhancing the overall quality of our work.

20        We have carefully considered each point raised by the referee and addressed them in  
21 detail. For ease of review, the referee's comments are shown in *red italics*, our  
22 point-by-point responses are shown in black font, and the revised manuscript excerpts are  
23 highlighted in blue font. Below, we provide our detailed responses and explicitly outline the  
24 specific revisions made to the manuscript.

25

26 *1. Table 1: In my opinion this table can be turned into a paragraph with proper referencing,*  
27 *and short explanations of the articles mentioned here, their contributions, and what they lack.*  
28 *It is a review article after all, and instead of giving a list of articles in a table format, I would*  
29 *much prefer to read how the authors think they contribute to the overall framework (or do*  
30 *they?).*

31 **Response:**

32 We thank the Referee for this suggestion. In response, Table 1 has been removed and  
33 replaced with a narrative discussion of previous review studies. The revised text highlights  
34 the scope and contribution of prior reviews and clarifies the research gaps addressed in the  
35 present study. All subsequent tables have been renumbered accordingly.

36 **Specific revisions are listed below:**

37 **1 Introduction**

38 ...

39 A growing body of literature reviews specific facets of disaster management. Early work addressed  
40 communication and information-sharing mechanisms, including machine learning for social media-assisted  
41 disaster response (Dwarakanath et al., 2021) and general emergency management systems (Feng and Cui,  
42 2021). Subsequent studies expanded toward broader technological infrastructures, examining the Internet of  
43 Emergency Services (Damaševičius et al., 2023), disaster-management analytical tools (Khan et al., 2023),  
44 and IoT integration in urban emergency systems (Saputra et al., 2025). More recent reviews have focused  
45 on intelligent and data-driven technologies, including digital twins for wildfire and post-disaster risk  
46 management (Li et al., 2024; Lagap and Ghaffarian, 2024), AI-based social media analytics (Abid et al.,  
47 2025), and UAV-enabled emergency logistics (Jazairy et al., 2025). Taken together, these reviews confirm  
48 the breadth of ERA-related research, yet several important gaps remain. Most focus on isolated

49 technologies or single disaster domains without integrating perception, decision-making, execution, and  
50 adaptive feedback within a unified architectural framework (Bhanye, 2025; Frykmer et al., 2021). Few  
51 examine ERA through a safety-science lens, leaving systemic attributes such as graceful degradation,  
52 interoperability, and human-automation coordination largely unaddressed. Existing reviews also rarely  
53 connect technological evolution with broader sociotechnical concerns including governance, trust, and  
54 adaptive learning, which are precisely the mechanisms that sustain the information silos undermining  
55 multi-agency emergency coordination.

56

57 *2. Instead of presenting the review questions in a semi-bullet format, which in fact reads much*  
58 *like a draft, again I would much prefer to read them within a proper paragraph. In their*  
59 *current form, they break the flow. Again, a review article should be a synthesis, and also one*  
60 *where the reader can concentrate on the information without structural breaks. While the*  
61 *current format the authors choose may work in a presentation, not so much as a section in a*  
62 *review article. It would be best if the authors re-structured and somewhat merged the section*  
63 *from lines 95-120. The scientific questions and the article's contributions and how this review*  
64 *will approach these issues can better be edited together into one or maximum two paragraphs.*  
65 *Especially the last part (the whole paragraph describing the article's sections) reads like a list*  
66 *and does not add any novel contribution to the subject being reviewed, but can be turned to a*  
67 *roadmap for the reader who may want to focus on a specific part of the review if better*  
68 *structured as a sentence or two.*

69 **Response:**

70 We appreciate the Referee's comment. We agree that the original presentation could be

71 improved in terms of narrative flow and organization in this section. The semi-bulleted format  
72 interrupted the continuity of the discussion and was less effective than a fully integrated  
73 narrative presentation for a review article.

74 In response, we have substantially revised and reorganized this part of the Introduction  
75 (Section 1). The specific improvements are outlined below:

76 1. Integration of Research Questions: We have removed the presentation-style,  
77 semi-bulleted research questions and incorporated them into the end of Paragraph 1 as part of  
78 a coherent narrative introducing the central scientific questions of the review.

79 2. Consolidation and Streamlining of Structure (Lines 95–120): We have merged and  
80 streamlined the previously fragmented narratives regarding our research contributions, the  
81 PRISMA methodology, and the article structure. The lengthy, list-style description of  
82 subsequent sections has been reshaped into a more compact and logically coherent overview  
83 that provides a clearer roadmap for readers.

84 These revisions have improved the coherence, readability, and overall narrative flow of  
85 the introduction. We also recognized that this concern extended beyond the specific section  
86 identified by the Referee. Accordingly, we revisited the manuscript more broadly and revised  
87 other sections where similar issues of narrative flow, structural fragmentation, or presentation  
88 style were present.

89 **Specific revisions are listed below:**

## 90 **1 Introduction**

91 In recent decades, disasters have become increasingly frequent and complex, spanning climate hazards,  
92 industrial accidents, and public health crises (Yu et al., 2018). While the 1982 Edmonton well blowout in

93 Canada was swiftly controlled through prompt ignition (Gephart, 1988), the 2003 Kaixian gas-well blowout  
94 in Chongqing resulted in over 190 fatalities due to delayed containment (Jianfeng et al., 2009). These  
95 contrasting cases underscore that the core value of emergency management lies in timely response and  
96 scientifically grounded decision-making. Yet despite unprecedented advances in sensing and  
97 communication technologies, real-world emergency operations remain constrained by fragmented data  
98 streams, incompatible platforms, and organizational information silos. This tension raises a question that  
99 runs through the present review: why do information silos persist in an era of advanced technology, and  
100 how can emergency systems be designed to overcome them?

101 Driven by the maturation of automation, Artificial Intelligence (AI), cloud-edge computing, and digital  
102 twins, Emergency Response Automation (ERA) has emerged as a framework for bridging intelligent  
103 technologies with operational reliability (Kyrkou et al., 2022). ERA has demonstrated the potential to  
104 improve situational awareness, accelerate information processing, and enable coordinated resource  
105 allocation across multiple actors and domains (Yang et al., 2013). Its practical value has been increasingly  
106 demonstrated across diverse emergency contexts, including automated resource scheduling following the  
107 Fukushima nuclear disaster (Nagatani et al., 2013), proactive containment tracking during the COVID-19  
108 pandemic (Andrejevic and O'Neill, 2024), and enhanced response coordination in nuclear power facilities  
109 (Chen et al., 2018). The shift toward data-driven autonomous systems, however, introduces persistent  
110 sociotechnical challenges. Reliability vulnerabilities, limited algorithmic interpretability, and fragile  
111 human-machine coordination under time pressure are among the most consequential. From a reliability  
112 engineering perspective, intelligent systems must not merely automate isolated tasks but augment human  
113 judgment, ensure fault tolerance, and maintain operational dependability when communication  
114 infrastructure degrades.

115 A growing body of literature reviews specific facets of disaster management. Early work addressed

116 communication and information-sharing mechanisms, including machine learning for social media-assisted  
117 disaster response (Dwarakanath et al., 2021) and general emergency management systems (Feng and Cui,  
118 2021). Subsequent studies expanded toward broader technological infrastructures, examining the Internet of  
119 Emergency Services (Damaševičius et al., 2023), disaster-management analytical tools (Khan et al., 2023),  
120 and IoT integration in urban emergency systems (Saputra et al., 2025). More recent reviews have focused  
121 on intelligent and data-driven technologies, including digital twins for wildfire and post-disaster risk  
122 management (Li et al., 2024; Lagap and Ghaffarian, 2024), AI-based social media analytics (Abid et al.,  
123 2025), and UAV-enabled emergency logistics (Jazairy et al., 2025). Taken together, these reviews confirm  
124 the breadth of ERA-related research, yet several important gaps remain. Most focus on isolated  
125 technologies or single disaster domains without integrating perception, decision-making, execution, and  
126 adaptive feedback within a unified architectural framework (Bhanye, 2025; Frykmer et al., 2021). Few  
127 examine ERA through a safety-science lens, leaving systemic attributes such as graceful degradation,  
128 interoperability, and human-automation coordination largely unaddressed. Existing reviews also rarely  
129 connect technological evolution with broader sociotechnical concerns including governance, trust, and  
130 adaptive learning, which are precisely the mechanisms that sustain the information silos undermining  
131 multi-agency emergency coordination.

132 To address these gaps, this review synthesizes 193 peer-reviewed studies on ERA, conducted in  
133 accordance with the PRISMA (Preferred Reporting Items for Systematic Reviews and Meta-Analyses)  
134 guidelines (Enu et al., 2023; Page et al., 2021a), from the perspective of safety science and reliability  
135 engineering. We propose a four-layer architectural framework covering perception and monitoring, data  
136 and decision-making, automated response and control, and feedback and learning. This framework serves  
137 to integrate heterogeneous findings, trace the evolution of ERA across technological generations, and  
138 expose the interoperability bottlenecks that sustain information silos. Figure 1 presents the functional

139 structure and evolutionary logic of the framework, providing a conceptual anchor for the synthesis that  
140 follows. Accordingly, Sections 2 and 3 establish the methodological foundations and structural definitions  
141 of ERA, before Sections 4 and 5 systematically evaluate the capabilities and real-world scenarios across the  
142 four architectural layers. Finally, Sections 6 and 7 contextualize these findings through a cross-cutting  
143 analysis of systemic limitations, institutional governance, and proactive future research directions.

144

145 *3. Per my comment above, you may alternately consider making better use of the figure*  
146 *captions. "System framework diagram" on its own makes no sense, and for the readers who*  
147 *consider the figures first and the writing next, it needs better explanation of more how this*  
148 *figure contributes to the review rather than what they are looking at. The authors may*  
149 *consider working on the caption of this figure along with the previous paragraphs to provide*  
150 *unity and continuity, but most importantly, context.*

151 **Response:**

152 We thank the Referee for this valuable suggestion. We agree that figure captions in a  
153 comprehensive review should be sufficiently informative and self-contained, helping readers  
154 understand not only the visual elements of a figure but also its relevance to the overall  
155 narrative and structure of the paper.

156 To address this concern, we have substantially revised the caption of Figure 1. Rather  
157 than merely describing the graphical components, the revised caption now explains how the  
158 four quadrants correspond to the major technological domains discussed in Sections 3–5 and  
159 how the concentric rings represent the evolutionary progression of emergency response  
160 automation systems across different development stages. In addition, the caption explicitly

161 links the figure to the organizational structure of the review, enabling it to serve as a  
 162 conceptual roadmap that guides readers through the subsequent sections. We believe that this  
 163 revision improves the figure's interpretability and strengthens its integration with the overall  
 164 synthesis presented in the manuscript.

165 **Specific revisions are listed below:**

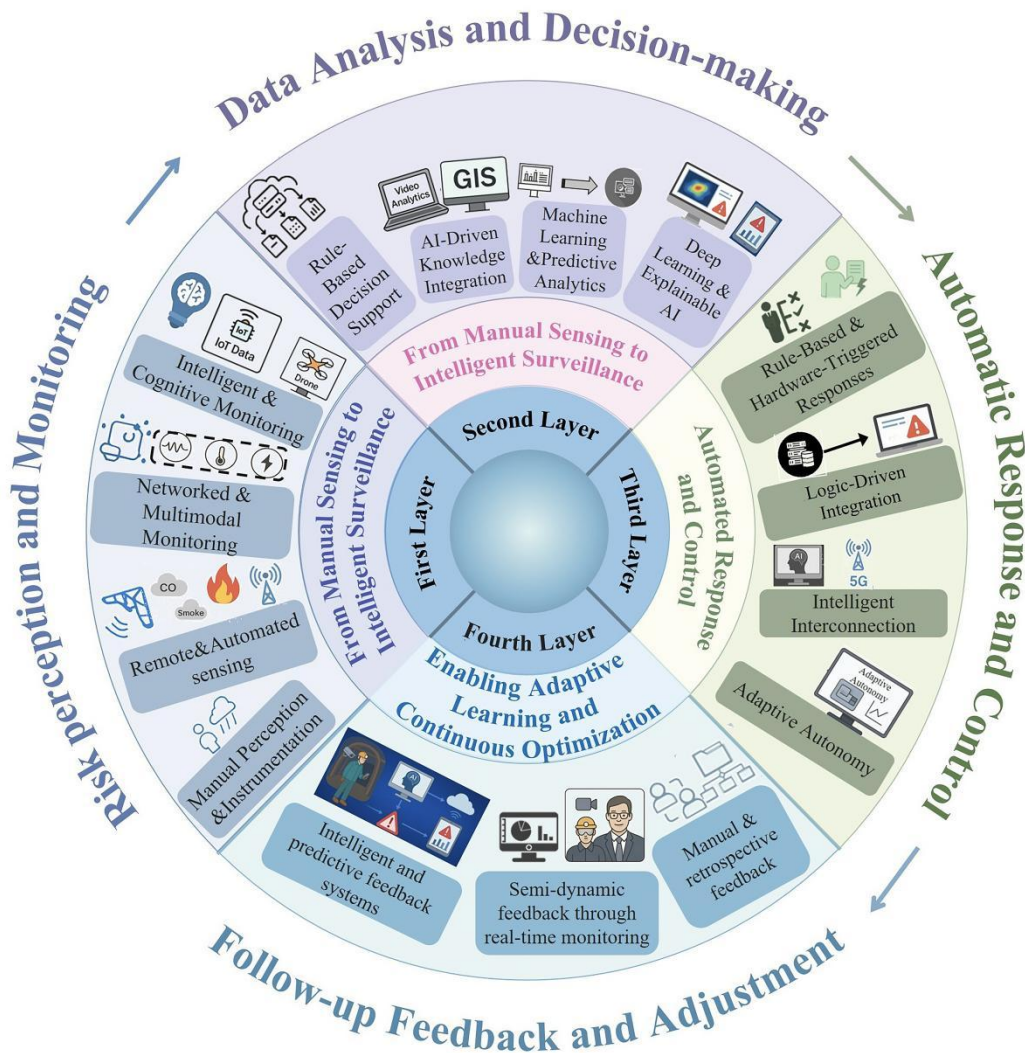

166  
 167 Figure 1 The four-layer architectural framework of Emergency Response Automation (ERA), serving as the  
 168 organizational backbone of this review. The four quadrants represent the core functional layers examined  
 169 across Sections 3–5: Risk Perception and Monitoring, Data Analysis and Decision-making, Automated  
 170 Response and Control, and Follow-up Feedback and Adjustment. The concentric rings trace the  
 171 technological evolution within each layer, from early manual and rule-based methods toward AI-driven and

172 autonomous paradigms, reflecting the developmental trajectory synthesized from 193 peer-reviewed studies.

173 Interpreting this figure alongside the Introduction provides the conceptual map through which the

174 cross-domain evidence in this review is structured and interpreted.

175

176 *4. Because of the points raised in the previous paragraphs, the introductory sentence to*

177 *Methodology section is repetitive.*

178 **Response:**

179 We sincerely appreciate the Referee's keen eye for structural precision and textual detail  
180 throughout our manuscript.

181 The Referee is entirely correct. Upon re-examining the original text, we agreed that the  
182 introductory sentence of Section 2 redundantly restated the definition and scope of ERA that  
183 had already been established in the Introduction. This repetition caused unnecessary  
184 redundancy and slowed down the transition into the methodology. To address this issue, we  
185 have removed this repetitive introductory sentence in the revised manuscript, allowing  
186 Section 2 to open directly and concisely with the core methodological details.

187

188 *5. My suggestion is to move Figures 2 and 3 to Appendix or Supplementary. Again, a review*

189 *article's most important aspect is the "review" or the synthesis or the subject. The statistics*

190 *are often secondary unless they contribute majorly to the subject being reviewed (for example,*

191 *if the aim is to show the lack of literature on a certain subject to encourage researchers to*

192 *consider this gap, literature statistics are important. And if this is the case with ERA, then the*

193 *authors should mention it. If not, these figures don't do much for the main article).*

194 **Response:**

195 We thank the Referee for this helpful suggestion. We agree that figures included in the  
196 main text should make a clear contribution to the objectives and synthesis of the review.

197 In response, the temporal-distribution figure (formerly Figure 2) has been moved from  
198 the main text to Appendix B, where it is now presented as Figure B1. The main text has been  
199 revised accordingly to briefly note that the rapid growth of ERA-related studies underscores  
200 the need for a comprehensive synthesis of the field.

201 For the PRISMA literature-screening flow diagram (formerly Figure 3 and now Figure 2),  
202 we respectfully chose to retain the figure in the methodology section. Because this review  
203 follows the PRISMA 2020 framework, we believe that retaining the screening flow diagram  
204 improves transparency and enables readers to readily understand the literature identification,  
205 screening, and selection process. We therefore consider its inclusion in the main text  
206 beneficial to the methodological clarity, transparency, and reproducibility of the review.

207 The numbering of the remaining figures and corresponding cross-references has been  
208 updated throughout the revised manuscript.

209 **Specific revisions are listed below:**

210 **2 Methodology**

211 ...

212 Following the PRISMA guidelines (Page et al., 2021a), we conducted a comprehensive search for  
213 2010–2025 (last search across all sources: 7 Mar 2026). Among the studies included in this review, 43 were  
214 published between 2010 and 2015, 64 between 2016 and 2020, and 86 between 2021 and 2025, indicating a  
215 clear and accelerating growth in ERA-related research over the past decade. A small number of earlier

216 references were retained to provide historical context. This rapid growth in ERA-related publications  
217 underscores the urgency of a systematic synthesis: the field is expanding faster than integrative frameworks  
218 can consolidate its findings. The full temporal distribution is presented in Appendix B.

## 219 **Appendix B: Temporal Distribution of ERA-Related Publications**

220 Figure B1 presents the temporal distribution of the 193 peer-reviewed studies systematically included  
221 in this review, grouped into three periods: 2010–2015 (n = 43), 2016–2020 (n = 64), and 2021–2025 (n =  
222 86). Several pre-2010 references were retained only to provide historical and conceptual background and  
223 were not counted as part of the PRISMA-based systematic corpus. The distribution indicates a clear and  
224 accelerating growth in ERA-related research, particularly after 2020.

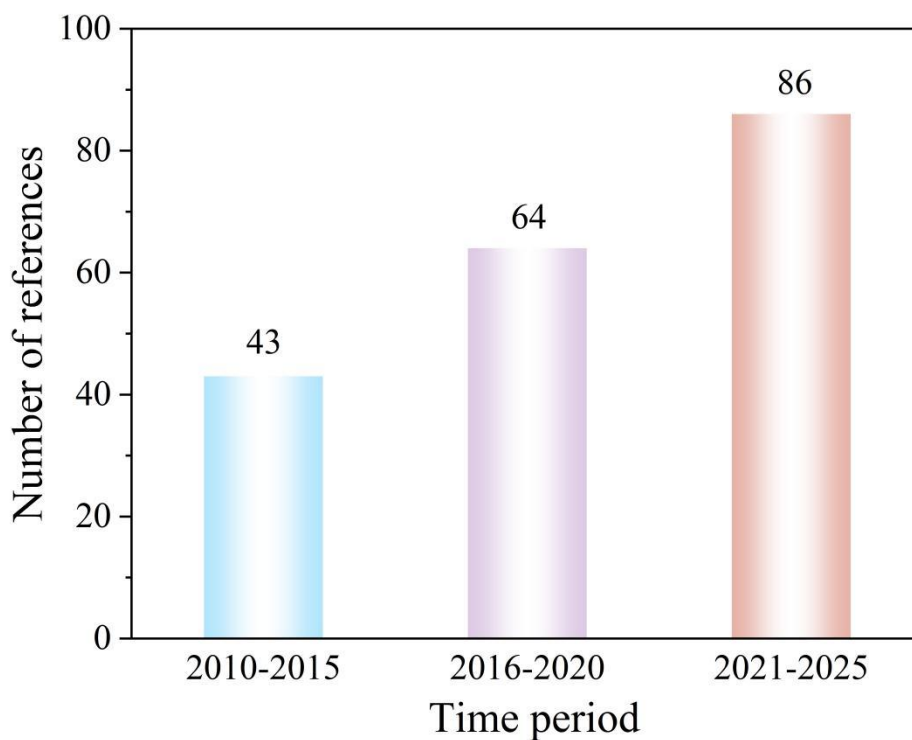

225  
226 Figure B1. Temporal distribution of the 193 ERA-related studies included in the PRISMA-based systematic  
227 review (2010–2025). References published before 2010 are provided as background literature and are not  
228 included in the systematic review corpus.

229

230 *6. Section 3. Composition and Definition: If this will be a separate section, even though only*  
231 *an introduction, I would expect it to be a bit longer, providing more information as to possibly*  
232 *the evolution of the concept, how this definition came to be. Also "composition" in the title*  
233 *doesn't make much sense to me, so unless it is better explained immediately after the section*  
234 *title, I suggest remove it altogether.*

235 **Response:**

236 We thank the referee for this valuable suggestion. We agree that the original Section 3  
237 was overly concise and did not provide sufficient context regarding the conceptual  
238 development of ERA.

239 Following your recommendation, we have removed the term “Composition” from the  
240 section title and renamed the section “3 Definition and Conceptual Evolution of ERA” to  
241 better reflect its purpose and functionality within the review.

242 We have also substantially revised and expanded this section to provide a clearer account of  
243 how the ERA concept has evolved alongside broader developments in emergency  
244 management, automation, and intelligent systems. The revised discussion now systematically  
245 traces the conceptual transition from early procedural and human-centred emergency  
246 protocols toward increasingly data-driven and intelligent systems, driven by the maturity of  
247 automation, computing, and communication technologies.

248 In addition, the revised section now more clearly explains how this cumulative evolution  
249 reflects the contemporary understanding of ERA as an integrated socio-technical system,  
250 establishing the theoretical foundation for the four-layer analytical framework utilized  
251 throughout the review. Simultaneously, we aimed to maintain the concise and transitional role

252 of this section within the overall structure of the manuscript to ensure a balanced narrative.

253 **Specific revisions are listed below:**

## 254 **3 Definition and Conceptual Evolution of ERA**

255       Emergency Response Automation (ERA) refers to the automatic initiation and execution of emergency  
256 measures through sensors, data-processing systems, and intelligent decision-making technologies, enabling  
257 rapid responses to incidents such as natural disasters, industrial accidents, and public health emergencies  
258 with reduced reliance on manual intervention (Matracia et al., 2022). Although the term itself is relatively  
259 recent, the underlying concept has evolved over several decades, progressing from early procedural and  
260 human-centred emergency protocols toward increasingly data-driven and intelligent systems as automation,  
261 computing, and communication technologies matured.

262       The contemporary concept of ERA did not emerge from a single technological breakthrough, but  
263 rather from the convergence of several research traditions. Early foundations were established in industrial  
264 automation and control engineering, where closed-loop sensing, feedback, and control mechanisms  
265 provided the fundamental sense – decide – act logic for automated responses (Hollnagel, 2018). In parallel,  
266 emergency management research contributed organizational structures, incident command systems, and  
267 standardized response procedures that defined how emergency actions should be coordinated under crisis  
268 conditions (Jensen and Thompson, 2016). Advances in information systems, communication networks, and  
269 decision-support technologies further enabled real-time situational awareness, distributed coordination, and  
270 data-driven decision-making (Newman et al., 2017). The gradual integration of these developments  
271 transformed emergency response from a predominantly human-centred activity into a hybrid human –  
272 machine system capable of supporting increasingly complex and dynamic operational environments.  
273 ERA is therefore best understood not as a single technology or predefined procedure, but as an integrated

274 socio-technical system in which sensing, decision-making, execution, and organizational learning operate  
275 as interdependent functional processes.

276

277 *7. Subsection 3.1 continues to mention methodology, and I suggest authors incorporate it*  
278 *above to Section 2.*

279 **Response:**

280 We completely agree with the Referee's structural critique. Methodological descriptions  
281 and analytical procedures should be consolidated within a dedicated section to maintain  
282 structural purity and prevent content overlap across chapters. We have fully implemented your  
283 suggestion through the following structural reorganizations:

284 1. All methodological narratives, thematic analysis procedures, and data classification  
285 workflows originally present in Subsection 3.1 have been extracted and fully integrated into  
286 Section 2 (Methodology).

287 2. Concurrently, Subsection 3.1, from which the redundant methodological content was  
288 removed, has been thoroughly streamlined and optimized to ensure a more coherent and  
289 focused introductory narrative.

290 **Specific revisions are listed below:**

291 **2 Methodology**

292 ...

293 To structure the synthesis, two reviewers independently conducted thematic analysis across the  
294 included studies through multiple iterative rounds of cross-comparison. This process identified four

295 recurring functional categories consistently appearing across ERA-related research: perception and  
 296 monitoring, data and decision-making, automated response and control, and feedback and adaptive learning.  
 297 These categories form the basis of the four-layer architectural framework developed in this review, as  
 298 illustrated in Figure 1. The included studies were further categorised according to these four layers, with the  
 299 quantitative distribution summarised in Table 1. A temporal evolution analysis across three developmental  
 300 phases (2010–2015, 2016–2020, and 2021–2025) was also conducted, as shown in Figure 3 (underlying  
 301 data in Appendix C), revealing a progressive transition in research focus from rule-based and  
 302 human-intensive approaches toward more intelligent, data-driven, and AI-enhanced systems. This temporal  
 303 analysis provides a quantitative basis for the conceptual evolution examined in the sections that follow.

304 Table 1. Quantitative distribution of included studies across the four-layer ERA architecture (2010–2025)

| Architecture layer         | Core thematic focus                                    | Number of studies | Proportion (%) |
|----------------------------|--------------------------------------------------------|-------------------|----------------|
| Perception layer           | From manual sensing to intelligent surveillance        | 47                | 24.35          |
| Decision-making layer      | Evolution of data-driven decision-making               | 56                | 29.02          |
| Response and control layer | Automated response and control mechanisms              | 47                | 24.35          |
| Feedback layer             | Enabling adaptive learning and continuous optimization | 43                | 22.28          |
| Total                      |                                                        | 193               | 100.00         |

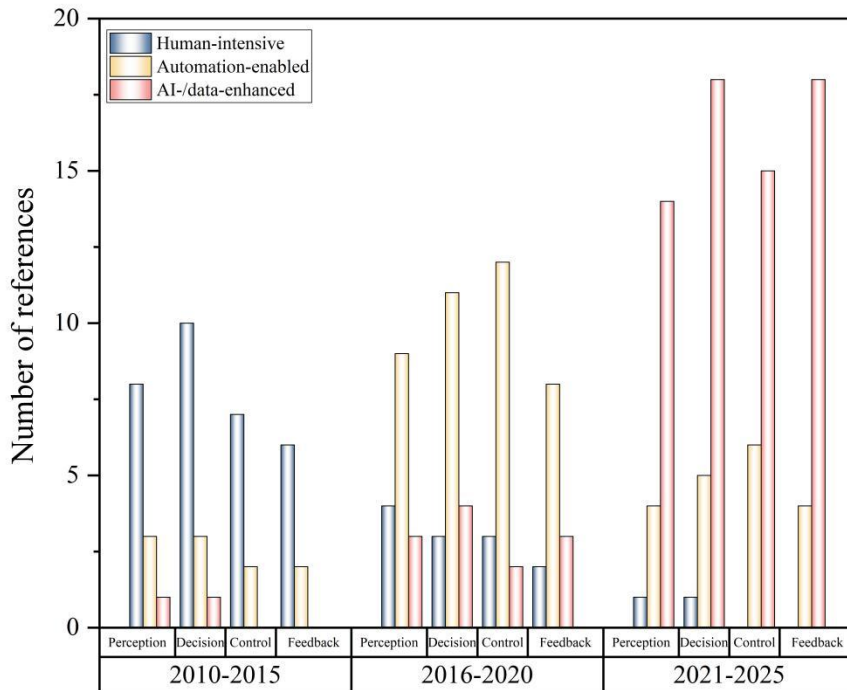

305

306 Figure 3. Evolution of the four ERA architectural layers across three developmental phases (2010–2025),

307 based on quantitative categorisation of the reviewed studies. The distribution reflects a consistent shift from

308 rule-based toward AI-driven approaches across all four layers.

### 309 3.1 System framework

310 The four-layer structure of ERA aligns with well-established automation paradigms in other domains.

311 Comparable hierarchical closed-loop architectures can be observed in robotics (Prezas et al., 2024),

312 industrial control systems (Nagorny et al., 2012), and reliability management frameworks (Hollnagel,

313 2018), all of which encompass a complete “Perceive–Reason–Act–Learn” process. Such consistency

314 demonstrates that the ERA framework reflects a widely recognized structural logic across

315 automation-intensive systems. From the perspectives of systems engineering and cybernetics (González et

316 al., 2021), the four-layer architecture ensures both functional completeness and logical closed-loop

317 reliability. Therefore, the proposed architecture is grounded in both empirical evidence and cross-domain  
318 theoretical foundations, providing a robust scientific basis for the development of adaptive and reliable  
319 ERA systems.

320

321 *8. In 3.2 and 3.3 I find the subsection titles unnecessary. They break the flow.*

322 **Response:**

323 We sincerely appreciate the Referee's insightful comment regarding the narrative flow  
324 and structural cohesion of Section 3. We agree that the previous use of multiple fragmented  
325 subsections interrupted the continuity of the evolutionary discussion and weakened the overall  
326 readability of the section.

327 In response to this suggestion, we reorganized Section 3 to improve thematic integration  
328 and narrative continuity. The previously separated subsections have been consolidated into a  
329 single subsection entitled “3.2 Technological Evolution Across the Four ERA Layers.” This  
330 title was chosen because the revised subsection covers not only the evolution of sensing and  
331 monitoring, but also data-driven decision-making, automated response and control, and  
332 feedback/adaptive learning. We also converted the former subsection-style fragments into  
333 paragraph-level thematic transitions, so that the discussion now reads as a continuous  
334 evolutionary synthesis rather than a series of disconnected components.

335 **Specific revisions are listed below:**

336 **3.2 Technological Evolution Across the Four ERA Layers**

337 To systematically examine the evolution of ERA, this section analyses the development of four  
338 interrelated architectural layers: risk perception and monitoring, data-driven decision-making, automated

339 response and control, and follow-up feedback and adjustment.

340 The risk perception and monitoring layer has evolved from manual observation toward intelligent and  
341 predictive surveillance systems, as illustrated in Figure 4. Early emergency monitoring relied heavily on  
342 human operators, analogue instruments, and field inspection. Meteorological observers manually recorded  
343 rainfall and seismic activity (Pagano et al., 2016), industrial personnel conducted periodic inspections using  
344 portable gas detectors (Hemingway et al., 2012) and public-health surveillance depended largely on manual  
345 sampling and reporting. Although these approaches provided basic situational awareness, they suffered  
346 from delayed response, limited spatial coverage, and subjective interpretation (Dang et al., 2018; Fonollosa  
347 et al., 2018).

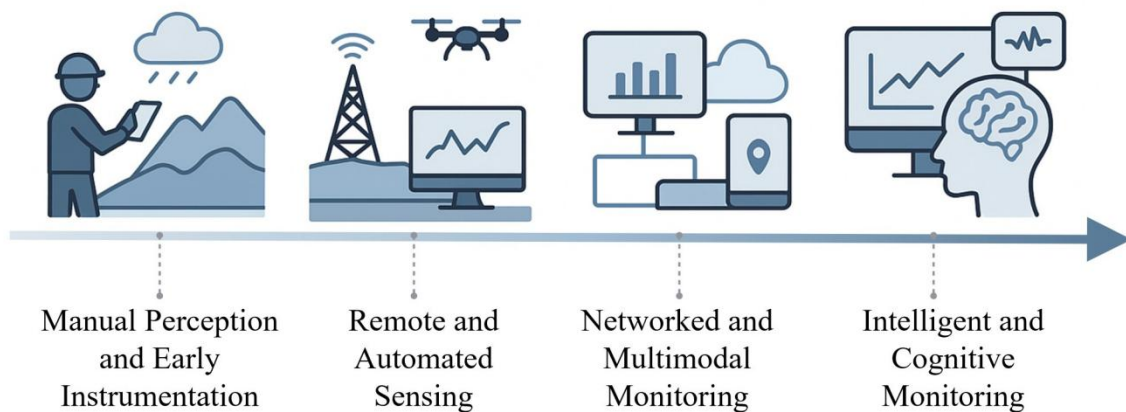

348  
349 Figure 4. Evolution of the risk perception and monitoring layer in ERA systems, tracing the transition from  
350 manual observation toward intelligent and predictive surveillance. The figure illustrates how advances in  
351 sensing and monitoring capabilities have progressively improved the reliability, timeliness, and scalability  
352 of ERA across different hazard domains.

353 The development of remote sensing satellites, radar systems, and wireless sensor technologies  
354 gradually shifted emergency monitoring toward automated data acquisition (Kodali and Yerroju, 2017;  
355 Stähli et al., 2015). Satellite-based observation improved continuous monitoring of floods, landslides, and  
356 wildfires (Al-Hady et al., 2023; Mois et al., 2017), while fixed gas and infrared sensors enhanced industrial

357 risk monitoring in near real time (Ni et al., 2018; Chraim et al., 2015; Jain and Kushwaha, 2012). In parallel,  
358 digital epidemiology systems began integrating hospital and regional health data for disease surveillance  
359 (Adiga et al., 2020). This stage marked the first integration of automated data acquisition into ERA,  
360 significantly improving detection timeliness and reliability.

361 With the emergence of IoT and multi-sensor fusion technologies, monitoring systems became  
362 increasingly multimodal and interconnected. Visual, thermal, acoustic, and social data streams were  
363 integrated to improve situational awareness across complex emergency scenarios (Alamdar et al., 2015).  
364 Applications included drone-assisted earthquake assessment (Contreras et al., 2021), fibre-optic sensing for  
365 industrial leakage detection (Ashry et al., 2022), and mobile-health applications for epidemic reporting and  
366 tracking (Moses et al., 2021). These networked sensing nodes laid the foundation for adaptive ERA  
367 architectures, where data streams directly informed early warning and resource allocation.

368 Recent advances in artificial intelligence, edge computing, and digital-twin technologies have further  
369 transformed risk monitoring from reactive anomaly detection into predictive risk anticipation (Bongomin et  
370 al., 2025). Deep-learning models now extract spatiotemporal patterns from multi-source data to identify  
371 emerging hazards in real time (Zhao et al., 2024; Algiriyage et al., 2022). In public health, AI-driven  
372 systems integrate genomic sequencing data with population mobility and social indicators to forecast  
373 epidemic trajectories (Ongesa et al., 2025; Hadfield et al., 2018). For example, COVID-19 early-warning  
374 systems have combined hospital diagnostic data with thermal-sensor information to improve outbreak  
375 detection and monitoring capabilities (Ding et al., 2025; Haque et al., 2024). In industrial safety, computer  
376 vision and reinforcement learning models autonomously diagnose abnormal equipment behavior, while  
377 explainable AI enhances operator trust in automated alerts (Rivas and Abrao, 2020; Sayed and Gabbar,  
378 2017). In natural disaster management, forest-fire monitoring increasingly relies on IoT, thermal imaging,  
379 drones, and AI algorithms to achieve early fire detection and spread prediction (Kavitha et al., 2023; Mehta

380 et al., 2021). Similar approaches have also been applied to earthquake early-warning systems, where GPS  
381 and seismic-sensor data are combined with machine-learning algorithms to improve warning accuracy  
382 (Becker et al., 2020). Additionally, the integration of big data technology enables automatic analysis of  
383 multi-source information such as social media, news reports, and police records to help predict and identify  
384 potential social security threats (e.g., the Violent Behavior Detection System (VBDS) applies deep learning  
385 to CCTV footage to detect violent behaviors (Shubber and Al-Ta'i, 2022)). Based on natural language  
386 processing and machine learning technologies, automated systems can monitor large volumes of open data  
387 sources in real time, detect early warning information related to violence, riots, terrorist activities, and  
388 provide decision support (Montasari, 2024; Florea et al., 2022; Robertson et al., 2019). These advances are  
389 propelling ERA from reactive monitoring toward proactive risk anticipation, with the transition from  
390 human-centred to human-machine hybrid perception continuously enhancing reliability, scalability, and  
391 cross-domain applicability.

392 Serving as the cognitive core of ERA, the data-driven decision-making layer has evolved from  
393 deterministic rule-based systems toward adaptive and intelligent analytics, as illustrated in Figure 5. Early  
394 emergency decision-support systems relied primarily on fixed logical rules and expert-defined procedures.  
395 Classical models such as Simon's intelligence-design-choice framework (Simon, 1960) and Montgomery's  
396 sequential decision model provided structured approaches for emergency reasoning and operational  
397 coordination (Montgomery and Svenson, 1976). These systems were widely applied in industrial and  
398 nuclear safety contexts because they offered transparency and procedural consistency, although their  
399 adaptability under rapidly changing conditions remained limited.

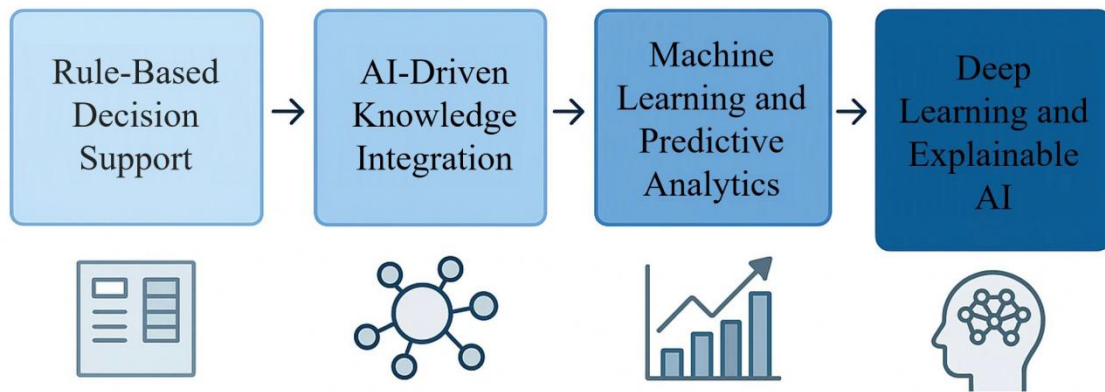

400  
 401 Figure 5. Evolution of the data-driven decision-making layer in ERA systems, showing the progression  
 402 from rule-based reasoning toward adaptive and AI-enabled decision support. The figure highlights how  
 403 analytical capabilities evolved alongside increasing challenges related to interpretability, uncertainty  
 404 management, and human–automation coordination.

405 With the expansion of sensor networks and computing power, rule-based DSS evolved into hybrid AI  
 406 systems combining symbolic reasoning and probabilistic inference (Uzma et al., 2025). Bayesian networks  
 407 and GIS-based tools enabled dynamic, multi-source situational assessment and predictive mapping  
 408 (Schneider et al., 2025; David et al., 2010). Group decision support (Coles et al., 2018) and game  
 409 theory–based optimization models enhanced interagency coordination under uncertainty (Lei et al., 2023),  
 410 reducing the isolation of single-agent frameworks. This phase bridged deterministic rules with adaptive  
 411 analytical reasoning through AI-enabled knowledge integration.

412 The proliferation of digital and sensor data shifted decision-making toward autonomous learning.  
 413 Algorithms such as neural networks (Liao et al., 2011), SVMs (Taamneh and Taamneh, 2021), and random  
 414 forests learned nonlinear risk–outcome relationships, enabling rapid forecasting of evolving emergencies (L.  
 415 Wang et al., 2024). Applications included wildfire propagation prediction (Bot and Borges, 2022; Pereira et  
 416 al., 2022; Sayad et al., 2019), explosion early warning, and evacuation optimization (Huang et al., 2024;  
 417 Zverovich et al., 2016; Rüppel and Schatz, 2011). Unlike prior hybrid systems, these models derived  
 418 decision rules directly from data, providing real-time adaptability to changing environments (Al-Hady et al.,

419 2023).

420 Recent advances have integrated deep learning–based perception technologies—such as natural  
421 language processing for text and social media analytics (Imran et al., 2014), computer vision for image and  
422 drone interpretation (Robertson et al., 2019), and multi-task learning for multi-hazard prediction—with  
423 explainable decision modules emphasizing transparency and human trust (For complex events, multi-task  
424 learning (MTL) has become pivotal, with Alam's MEDIC dataset demonstrating a 30% reduction in  
425 computational overhead without accuracy loss (Alam et al., 2023)). Representative systems include  
426 AI-driven disaster response platforms (e.g., Fertier's AIC system dynamically generate response strategies  
427 (Fertier et al., 2020)), vision-based recognition frameworks (e.g., VGG/YOLO (Robertson et al., 2019)),  
428 medical emergency decision centers (Althouse et al., 2015), and generative AI Decision Support Systems.  
429 These examples demonstrate how advanced neural architectures enable real-time linkage between  
430 perception and strategic decision-making (Ayan et al., 2022). Although these approaches significantly  
431 enhance adaptability and analytical capability, they also introduce concerns related to interpretability,  
432 reliability, bias, and human–automation coordination. As a result, emergency decision-making has become  
433 increasingly adaptive, data-driven, and capable of operating under uncertain and rapidly evolving  
434 conditions.

435 The automated response and control layer has evolved from threshold-triggered mechanisms and  
436 localized automated actions toward increasingly autonomous, interconnected, and adaptive response  
437 systems, as illustrated in Figure 6. Early automation systems relied mainly on threshold-triggered  
438 mechanisms activated after anomaly detection (Esposito et al., 2022). Systems such as debris-flow warning  
439 platforms enabled basic early-warning functionality but remained heavily dependent on manual verification  
440 and intervention (Jafari et al., 2020; Badoux et al., 2009). At this stage, emergency automation remained  
441 localized, reactive, and weakly interconnected.

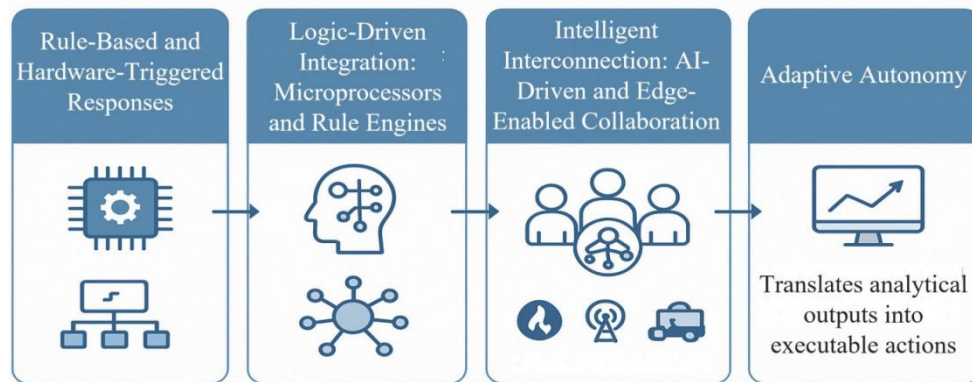

442

443 Figure 6. Evolution of the automated response and control layer in ERA systems, illustrating the shift from

444 localized alarm-triggered automation toward interconnected and adaptive operational control. The figure

445 synthesizes the convergence of communication, coordination, and orchestration capabilities while

446 highlighting remaining interoperability challenges in multi-agency emergency response.

447 The second stage marked a transition from manual activation to programmable logic control, driven by

448 the introduction of microprocessors and rule-based engines. Emergency response systems for hazardous

449 materials (Zografos et al., 2000) and dynamic seismic mapping platforms (Bingli et al., 2014) enabled

450 automation based on predefined rules and contextual thresholds. Concurrently, advances in mobile and

451 wireless communication facilitated remote alerts and cross-platform coordination (Kuantama et al., 2013,

452 2012). For example, Azid et al. (2022) developed an Android-based flood warning application utilizing web

453 services for automatic notifications (Sung et al., 2022), while De Souza et al. (2015) integrated real-time

454 hydrological monitoring with user geolocation to deliver context-aware SMS alerts (De Souza et al., 2015).

455 Automation at this stage exhibited logic-driven and distributed characteristics, yet remained constrained by

456 static rules and limited situational awareness.

457 With the integration of deep learning, the Internet of Things (IoT), and 5G/B5G communication

458 networks (Dixit et al., 2022; Euchi, 2021), automated response systems entered the stage of intelligent

459 interconnection. Technologies such as device-to-device communication (Ever et al., 2020; Ahmed et al.,

460 2019) and the Internet of Emergency Services (IoES) enabled multi-channel, low-latency information

461 exchange among heterogeneous agencies (Damaševičius et al., 2023). Multi-access edge computing and  
462 service-oriented architectures facilitated real-time deployment of adaptive services, while intelligent  
463 transportation systems provided the foundation for networked emergency mobility (Chen and Englund,  
464 2018). AI models—including CNN-based incident detection (Kim et al., 2019) and deep recurrent neural  
465 network–based event classification (dos Santos et al., 2019)—further enhanced the precision of automated  
466 control.

467         Since the 2020s, ERA systems have evolved toward adaptive and decentralized coordination, enabling  
468 dynamic sharing of authority (Chen et al., 2008) and resources across multiple agencies (Janssen et al.,  
469 2010). Recent examples include IoT- and BIM-enabled fire detection and suppression systems integrating  
470 sprinkler control and escape-route optimization (Annadurai et al., 2024; Jiang et al., 2023; Mondal et al.,  
471 2023). Architectures based on ontology and multi-agent systems support semantic interoperability and  
472 autonomous negotiation among heterogeneous organizations (Maalel and Ghézala, 2019).  
473 Rule-/ontology-based emergency decision-support systems integrate event-driven reasoning and semantic  
474 inference to keep a continuously updated operational picture and support rapid task (re)allocation and  
475 resource redistribution (Cui et al., 2024). Meanwhile, the Matter-IoT framework improves device  
476 interoperability and response reliability through standardized protocols (Bhardwaj and Joshi, 2024). The  
477 emergence of the digital twin paradigm (Fan et al., 2021) further propels the transition from operational  
478 automation to cyber-physical co-evolution, where continuously updated situational data refine simulation  
479 models to optimize control strategies. These developments shifted ERA from isolated automated actions  
480 toward interconnected and coordinated operational control.

481         The follow-up feedback and adjustment layer has evolved from retrospective post-event assessment  
482 toward continuous learning and adaptive system optimization, as illustrated in Figure 7. Early  
483 emergency-management systems relied primarily on post-event reports and manually generated

484 performance assessments to identify lessons learned after incidents or simulation exercises (Ramabrahmam  
485 et al., 1996). Feedback at this stage was largely retrospective and corrective, with limited capacity for  
486 continuous optimization.

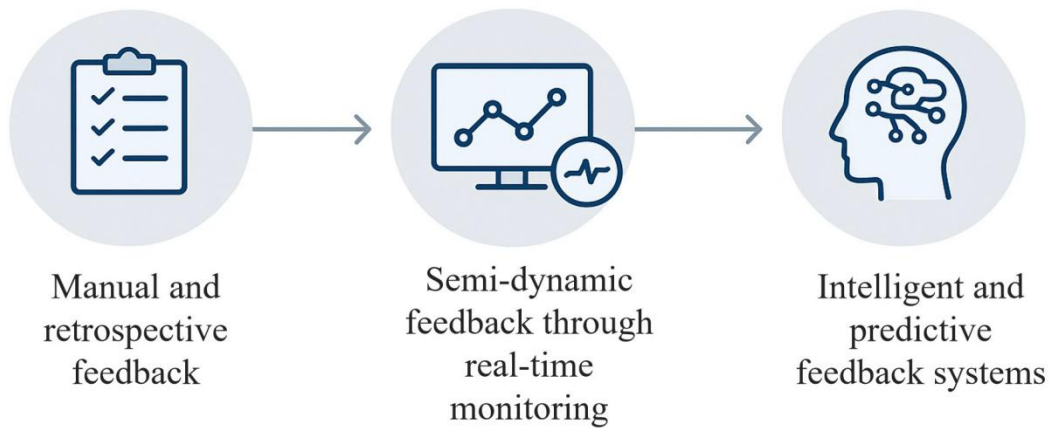

487  
488 Figure 7. Evolution of the feedback and adjustment layer in ERA systems, tracing the transition from  
489 retrospective post-event evaluation toward continuous and predictive adaptation. The figure demonstrates  
490 how adaptive feedback mechanisms increasingly support operational resilience, dynamic learning, and  
491 real-time optimization in contemporary ERA systems.

492 Advances in sensing, communication, and computational technologies gradually enabled real-time  
493 monitoring and semi-automated evaluation processes (Ding et al., 2022; Newman et al., 2017; Sättele et al.,  
494 2015). Researchers improved alarm reliability, optimized monitoring-data utilization, and introduced  
495 location-based planning models to support disaster logistics and resource coordination (Giroto et al., 2024;  
496 Wang and Nie, 2023). The integration of BIM, GIS, and IoT technologies further enhanced interoperability  
497 and spatial information sharing across emergency-management systems (Sani and Abdul Rahman, 2018;  
498 Boguslawski et al., 2015), marking a shift from static post-event analysis toward semi-dynamic feedback.

499 The rise of AI and big-data analytics has since transformed feedback mechanisms into intelligent  
500 adaptive systems capable of continuous learning and proactive optimization. ERA systems can now  
501 continuously adjust operational priorities and resource allocation during evolving emergencies by

502 integrating real-time medical, transportation, and social data streams (G. Zhang et al., 2024; Zhang et al.,  
503 2014). Deep-learning and reinforcement-learning methods further support proactive adaptation by  
504 identifying emerging risk patterns and refining decision policies through continuous performance feedback  
505 (Li, 2024; Arulkumaran et al., 2017; Rathore et al., 2016). Overall, the feedback layer has evolved from  
506 retrospective evaluation toward continuous and predictive adaptation, enabling ERA systems to  
507 progressively improve operational resilience, responsiveness, and coordination performance under dynamic  
508 conditions.

509 Across these four layers, the evolution of ERA reflects a broader transition from reactive and  
510 fragmented automation toward integrated, intelligent, and adaptive emergency-management systems.

511

512 *9. The caption for Figure 4 can use a more detail. Same for Figure 5. Just describing the*  
513 *figures is barely enough for an article. How this figure contributes to the subject at hand*  
514 *should be detailed.*

515 **Response:**

516 We appreciate the Referee's valuable suggestion. We agree that the original figure  
517 captions were overly brief and primarily descriptive, and did not sufficiently explain how the  
518 figures contribute to the broader synthesis and analytical framework of the review. In response,  
519 we revised and expanded the captions of the relevant figures throughout the manuscript to  
520 improve their clarity, interpretive value, and self-explanatory nature. The revised captions  
521 now more explicitly describe the conceptual role of each figure, including the technological  
522 transitions, integration pathways, and key challenges illustrated in the evolutionary  
523 framework.

524 **Specific revisions are listed below:**

525 The revised captions are provided below:

526 1. Revised Caption for Figure 1: Figure 1. The four-layer architectural framework of Emergency Response  
527 Automation (ERA), serving as the organizational backbone of this review. The four quadrants represent the  
528 core functional layers examined across Sections 3–5: Risk Perception and Monitoring, Data Analysis and  
529 Decision-making, Automated Response and Control, and Follow-up Feedback and Adjustment. The  
530 concentric rings trace the technological evolution within each layer, from early manual and rule-based  
531 methods toward AI-driven and autonomous paradigms, reflecting the developmental trajectory synthesized  
532 from 193 peer-reviewed studies. Interpreting this figure alongside the Introduction provides the conceptual  
533 map through which the cross-domain evidence in this review is structured and interpreted.

534

535 2. Revised Caption for Figure 2: Figure 2. PRISMA 2020 flow diagram for the systematic review,  
536 documenting the identification, screening, and inclusion of 193 studies (2010–2025).

537

538 3. Revised Caption for Figure 3: Figure 3. Evolution of the four ERA architectural layers across three  
539 developmental phases (2010–2025), based on quantitative categorisation of the reviewed studies. The  
540 distribution reflects a consistent shift from rule-based toward AI-driven approaches across all four layers.

541

542 4. Revised Caption for Figure 4: Figure 4. Evolution of the risk perception and monitoring layer in ERA  
543 systems, tracing the transition from manual observation toward intelligent and predictive surveillance. The  
544 figure illustrates how advances in sensing and monitoring capabilities have progressively improved the  
545 reliability, timeliness, and scalability of ERA across different hazard domains.

546

547 5. Revised Caption for Figure 5: Figure 5. Evolution of the data-driven decision-making layer in ERA  
548 systems, showing the progression from rule-based reasoning toward adaptive and AI-enabled decision  
549 support. The figure highlights how analytical capabilities evolved alongside increasing challenges related to  
550 interpretability, uncertainty management, and human–automation coordination.

551

552 6. Revised Caption for Figure 6: Figure 6. Evolution of the automated response and control layer in ERA  
553 systems, illustrating the shift from localized alarm-triggered automation toward interconnected and  
554 adaptive operational control. The figure synthesizes the convergence of communication, coordination, and  
555 orchestration capabilities while highlighting remaining interoperability challenges in multi-agency  
556 emergency response.

557

558 7. Revised Caption for Figure 7: Figure 7. Evolution of the feedback and adjustment layer in ERA systems,  
559 tracing the transition from retrospective post-event evaluation toward continuous and predictive adaptation.  
560 The figure demonstrates how adaptive feedback mechanisms increasingly support operational resilience,  
561 dynamic learning, and real-time optimization in contemporary ERA systems.

562

563 8. Revised Caption for Figure 8: Figure 8. Proposed next-generation architecture for ERA. The framework  
564 integrates three core technological pillars, methodological coordination mechanisms, and closed-loop  
565 adaptive control. It illustrates how the Digital Twin Middleware Platform (DTMP), the AI - Expert Hybrid  
566 Decision Engine (AI-E), and the Intelligent IoT Edge Network (I-IEN) interact to support resilient human  
567 - automation collaboration and adaptive emergency management across diverse hazard scenarios.

568

569 *10. Similar issues on Section 4. The introduction (since this is a review) should be a bit more*

570 *explanatory. Not a single sentence. It would even be better if they included some references.*  
571 *For example, "the advantages of ERA have been detailed as.. by..." I, as a reader would like*  
572 *to see why only four points summarize the advantages of the framework. Is it because certain*  
573 *literature established this, or is it because the research thus far is limited.*

574 **Response:**

575 The Referee raises an important point regarding the introductory structure of Section 4.  
576 We agree that the introduction should do more than briefly describe the topic. It should also  
577 explain the rationale of the classification framework and provide sufficient literature context  
578 for the following discussion.

579 In response to this suggestion, we have substantially rewritten and expanded the  
580 introductory section of Section 4 to more explicitly justify the rationale of our taxonomy and  
581 clarify the boundaries of the current review. The main revisions are summarized as follows:

582 1. We introduced representative empirical studies to anchor the opening discussion and  
583 adopted a more interpretive synthesis style, as suggested by the Referee (e.g., “their  
584 operational advantages have been documented in...”).

585 2. We clarified that, although the four dimensions discussed do not exhaust all  
586 theoretically possible benefits of ERA, they represent the themes most systematically  
587 examined and empirically validated across the 193 studies included in this review.

588 3. We explicitly linked these four dimensions to the four architectural layers established  
589 in Section 3 (perception, decision-making, control, and feedback). This revision better reflects  
590 the contemporary boundaries of the field by highlighting where automation has achieved  
591 measurable operational improvements and where empirical evidence remains limited.

592 **Specific revisions are listed below:**

## 593 **4 Advantages of ERA**

594       The operational advantages of ERA systems have been documented across a broad body of empirical  
595 and applied research. As the field has matured, four recurring dimensions have emerged consistently across  
596 the reviewed literature: data-driven decision support, temporal efficiency in rapid response, geospatial  
597 precision in resource allocation, and computational optimization for intelligent dispatch. These dimensions  
598 are not exhaustive of all possible ERA benefits, but reflect the aspects most systematically examined in the  
599 studies reviewed here (Kyrkou et al., 2022; Yang et al., 2013). Their identification through four  
600 architectural layers—perception, decision-making, control, and feedback—also reflects the boundaries of  
601 current research, highlighting where automated implementations have demonstrated quantifiable success  
602 and where broader empirical validation remains limited.

603

604 *11. Lines 441-443 would better be incorporated into a paragraph with proper references (who*  
605 *applied these selection criteria to their research, or who established these as selection criteria)*  
606 *The way it reads now is much like an opinion piece than a review. My aim reading a review is*  
607 *mainly to find out about the studies in a certain field, and building a reading list for future*  
608 *research.*

609 **Response:**

610       The Referee raises an important point regarding the objectivity of system selection in  
611 review articles. We agree that the classification and selection of systems should be grounded  
612 in recurring patterns in the literature rather than subjective author judgment.

613 In response to this comment, we revised the text around Lines 441–443 and incorporated  
614 it into the introduction of Section 5. The revised version no longer presents the selection  
615 criteria as a simple itemized list. Instead, the selection rationale is now explained through a  
616 literature-based narrative.

617 Specifically, we clarified that the systems discussed in this section were selected based  
618 on several commonly observed features in the literature, including recurrent discussion across  
619 peer-reviewed studies, coverage of different ERA technological pathways, and their ability to  
620 reflect typical trade-offs among perception, decision-making, execution, and feedback  
621 capabilities. We also clarified that this organization was intended to reflect recurring patterns  
622 in existing research rather than the authors' subjective assessment of technological  
623 importance.

624 **Specific revisions are listed below:**

## 625 **5 Typical Application Scenarios**

626 ...

627 This section reviews emergency response systems and platforms that have been widely discussed in  
628 the existing literature (Kyrkou et al., 2022), with emphasis on their core functions, enabling technologies,  
629 application contexts, and supporting evidence. The systems included in this section were selected based on  
630 several considerations commonly adopted in systematic review studies (Page et al., 2021a): recurrent  
631 discussion across multiple peer-reviewed studies, coverage of different technological pathways within the  
632 ERA framework, and the ability to reflect typical trade-offs among perception, decision-making, execution,  
633 and learning capabilities (Hollnagel, 2018). This approach systematically aligns the selected cases with the  
634 established consensus and structural benchmarks of the broader literature.

635

636 *12. Lines 448-453 can easily be turned into a paragraph, even a sentence.*

637 **Response:**

638 We thank the Referee for this helpful suggestion regarding the presentation of the text.  
639 We agree that integrating these previously fragmented descriptions into a more structured and  
640 information-dense sentence improves the conciseness, readability, and overall academic tone  
641 of the manuscript.

642 Following this suggestion, we revised and consolidated the original text in Lines  
643 448–453 into a single cohesive sentence to improve narrative flow and reduce unnecessary  
644 fragmentation.

645 **Specific revisions are listed below:**

## 646 **5.1 Cross-System Comparative Analysis**

647 To support consistent comparison across systems, each case was analysed according to six ERA  
648 capability dimensions: multi-source sensing and monitoring, decision support, operational execution,  
649 interoperability and data sharing, robustness and fault tolerance, and adaptive learning.

650

651 *13. Same for lines 463-482. Also, previously it was mentioned that "This section summarizes*  
652 *the representative emergency response systems and platforms that frequently appear in the*  
653 *literature..." however I cannot see any reference to any literature. I gather that there are*  
654 *Tables, but again I would like to read a synthesis of the articles provided in these lists with*  
655 *proper in paragraph referencing. The authors may choose to include the Table in the*

656 *Appendix or a Supplementary file, alternatively.*

657 **Response:**

658 We thank the Referee for this important comment regarding the methodological rigor and  
659 synthesis quality of the discussion section. We fully agree that comparative and generalised  
660 conclusions in a comprehensive review article should be explicitly supported by in-text  
661 references. In response to this suggestion, we revised the relevant section in two main ways.

662 First, we reorganized the originally fragmented discussion into two more cohesive  
663 thematic paragraphs focusing on (1) convergent patterns across ERA systems and (2)  
664 differences among application domains. This structural revision was intended to improve the  
665 logical flow of the discussion and strengthen the synthesis-oriented character of the review.

666 Second, we systematically incorporated explicit in-text references throughout the  
667 discussion (e.g., Esposito et al., 2022; Hoff and Bashir, 2015; Hancock et al., 2011; Homier et  
668 al., 2021; Jafari et al., 2020; Gevaert et al., 2021) to ensure that all comparative observations  
669 are directly grounded in representative empirical studies.

670 **Specific revisions are listed below:**

671 **5.1 Cross-System Comparative Analysis**

672 ...

673 Across the reviewed systems, several convergent patterns emerge. Most follow a layered perception–  
674 analysis–decision–execution sequence, which broadly aligns with the four-layer ERA framework proposed  
675 in this review, with investment concentrated on early detection capabilities such as sensor networks, remote  
676 sensing, and video analytics (Esposito et al., 2022). Although automated rules support many routine  
677 functions, critical decisions generally retain human oversight in most operational systems (Hoff and Bashir,

678 2015; Hancock et al., 2011). In contrast, real-time adaptive learning remains limited, with many systems  
679 still operating at prototype stage. Persistent interoperability gaps and data silos continue to hinder  
680 multi-agency coordination.

681 Domain-specific divergences are also evident. Logistics systems place greater emphasis on automated  
682 execution, whereas monitoring systems are more commonly designed to support human decision-making  
683 (Jazairy et al., 2025). Natural hazard systems must handle sensor noise and false alarms, while industrial  
684 systems rely more on deterministic logic to reduce false positives (Jafari et al., 2020). Evidence maturity  
685 varies considerably across domains, and urban surveillance systems face additional privacy and governance  
686 challenges largely absent in closed industrial settings (Gevaert et al., 2021). Overall, ERA demonstrates  
687 broad applicability across hazard types and operational contexts, but trade-offs among sensing accuracy,  
688 automation depth, interoperability, and socio-legal constraints remain central challenges for its future  
689 development and large-scale deployment.

690

691 *14. 5.2 and 6.3, again, please integrate the bullet points into proper paragraphs.*

692 **Response:**

693 We once again thank the Referee for the careful reading and valuable suggestions. We  
694 fully agree that reducing fragmented list-style presentation can improve the narrative flow and  
695 overall readability of the manuscript. In response to this comment, we revised both Sections  
696 5.2 and 6.3 by removing the itemized lists and integrating the content into continuous  
697 academic discussion.

698 For Section 5.2, the original bullet points were incorporated into the main narrative to  
699 establish a clearer empirical connection between the conceptual framework and operational

700 realities without interrupting the continuity of the discussion.

701 For Section 6.3, the previous itemized structure was reorganized into a continuous  
702 explanatory paragraph in order to preserve technical clarity while improving structural  
703 coherence and readability.

704 **Specific revisions are listed below:**

## 705 **5.2 Summary**

706 This section maps representative ERA systems onto a clearly defined capability matrix and synthesizes  
707 cross-system evidence to reveal both the generic capability dimensions of ERA and the system-specific  
708 trade-offs involving robustness, interoperability, and operational autonomy. This approach establishes a  
709 transparent, evidence-based framework linking concrete systems to framework components and identifies  
710 cross-domain research priorities to guide future ERA development.

711

## 712 **6.3 Next-generation ERA model framework**

713 ...

714 The model is built around three closely connected components. The Digital Twin Middleware  
715 Platform (DTMP) links virtual and physical environments to support real-time simulation, validation, and  
716 adaptive system adjustment. The AI-Expert Hybrid Decision Engine (AI-E) combines data-driven analytics  
717 with expert judgement to improve decision transparency and operational reliability. The Intelligent IoT  
718 Edge Network (I-IEN) integrates edge computing, next-generation communication technologies, and  
719 blockchain-supported data management to enhance connectivity and information security across distributed  
720 ERA environments.

721 *15. Fig. 8 please expand the caption to include detailed information (see previous comments*  
722 *on Figures).*

723 **Response:**

724 We fully agree with the Referee's valuable suggestion. Consistent with the revisions  
725 made to the preceding figures, we have substantially expanded the caption of Figure 8 to  
726 ensure that it functions as a standalone and self-explanatory conceptual framework.

727 Rather than merely describing the graphical components, the revised caption now  
728 clarifies the purpose of the framework, the roles of its three core technological pillars, and the  
729 mechanisms through which these components interact to support adaptive emergency  
730 response. Specifically, the caption explains how the Digital Twin Middleware Platform  
731 (DTMP), the AI–Expert Hybrid Decision Engine (AI-E), and the Intelligent IoT Edge  
732 Network (I-IEN) are integrated through methodological coordination and closed-loop  
733 feedback mechanisms. It also explicitly links the framework to the major application contexts  
734 discussed throughout the review, including natural hazards, industrial emergencies, and  
735 public-health crises.

736 **Specific revisions are listed below:**

737 *Figure 8. The proposed next-generation ERA architectural model, integrating three core*  
738 *technological pillars, methodological coordination mechanisms, and closed-loop adaptive*  
739 *control. The framework synthesizes the major findings of this review into a forward-looking*  
740 *system architecture, illustrating how the Digital Twin Middleware Platform (DTMP), the*  
741 *AI–Expert Hybrid Decision Engine (AI-E), and the Intelligent IoT Edge Network (I-IEN)*  
742 *interact to support resilient human–automation collaboration and adaptive emergency*

743 management across diverse hazard scenarios.

744

745 *16. Table 5 can massively benefit from proper references. Right now I don't know if this is*  
746 *what the readers think or what their literature review rendered. Lines 661-668 which refer to*  
747 *the table also has no references.*

748 **Response:**

749 We sincerely thank the Referee for this valuable observation. We agree that the  
750 conclusions summarized in Table 5 in the original manuscript (now Table 4 in the revised  
751 manuscript following the removal of the previous Table 1), as well as the associated  
752 discussion (formerly Lines 661–668), should be clearly supported by the reviewed literature  
753 rather than appearing as unsupported author interpretations.

754 To address this concern, we have added representative references both within the revised  
755 Table 4 and in the corresponding discussion section. In addition, a table note has been  
756 included to clarify that the reported advantages, limitations, and cross-domain observations  
757 are synthesized from recurring findings across the reviewed studies. These revisions improve  
758 the traceability and transparency of the evidence underlying the table and make it clearer that  
759 the summarized conclusions represent a literature-based synthesis rather than subjective  
760 author judgment.

761 The corresponding revisions can be found in Table 4 and the related discussion section of  
762 the revised manuscript.

763 **Specific revisions are listed below:**

764 **5.1 Cross-System Comparative Analysis**

765 ...

766 Building upon the preceding system-level and capability-level analyses, we now focus on the shared  
767 technological foundations that enable efficient ERA. Table 4 provides a cross-domain synthesis of the key  
768 enabling technologies. These technologies are widely deployed across different operational contexts and  
769 collectively support perception, decision-making, coordination, and adaptive control under conditions of  
770 uncertainty (Kyrkou et al., 2022; Hollnagel, 2018).

771 This integrative perspective aligns with the principles of the U.S. National Incident Management  
772 System (NIMS) and the Incident Command System (ICS), both of which emphasize interoperability,  
773 unified command, and flexible coordination (Elmhadi et al., 2020). Similarly, a cross-domain ERA  
774 architecture emphasizes technological convergence over fragmentation, advocating a transition from  
775 domain-specific automation toward a systemic, learning-oriented, and trust-enhancing framework for  
776 intelligent emergency management (González et al., 2021).

Table 4. Cross-domain Technology Matrix for ERA.

Note. Citations in each row indicate representative studies for the corresponding technology and application domain. The reported advantages and limitations synthesize common findings from the reviewed literature.

| Technology                                | Environmental & Natural Hazards                                                                                                        | Industrial & Infrastructure Emergencies                                                   | Public Health & Social Safety                                                                                                    | Cross-domain Insights                                                                                                                                                                                             |
|-------------------------------------------|----------------------------------------------------------------------------------------------------------------------------------------|-------------------------------------------------------------------------------------------|----------------------------------------------------------------------------------------------------------------------------------|-------------------------------------------------------------------------------------------------------------------------------------------------------------------------------------------------------------------|
| Remote Sensing (Satellite, UAV, LiDAR)    | Provides large-scale monitoring, terrain mapping, and damage assessment for floods, earthquakes, and wildfires (Al-Hady et al., 2023). | Detects gas leaks, fires, and structural anomalies in critical facilities.                | Supports environmental surveillance, crowd monitoring, and mobility management during crises.                                    | Advantage: Enhances situational awareness and early impact assessment.<br>Limitation: Limited accuracy in indoor/underground settings and affected by data latency (Algiriya et al., 2022).                       |
| IoT and Sensor Networks                   | Collects distributed data (temperature, vibration, water levels) to support real-time disaster detection (Esposito et al., 2022).      | Enables continuous monitoring of chemical concentrations, pressure, and equipment health. | Tracks medical supplies, patient status, and logistics for dynamic resource allocation.                                          | Advantage: Provides fine-grained, real-time data connectivity.<br>Limitation: Vulnerable to communication failure and interoperability issues (Damaševičius et al., 2023).                                        |
| Big Data & Cloud/Fog Computing            | Supports predictive modeling and dynamic warning through multi-source data fusion.                                                     | Facilitates anomaly detection, failure prediction, and decision optimization.             | Enables epidemic trend analysis and healthcare resource coordination (Li, 2024; Arulkumaran et al., 2017; Rathore et al., 2016). | Advantage: Integrates heterogeneous data for rapid decision-making (Zhao et al., 2024; Algiriya et al., 2022).<br>Limitation: Privacy, latency, and standardization remain major challenges (Sheng et al., 2021). |
| Explainable Artificial Intelligence (XAI) | Improves interpretability of hazard forecasting and decision support models (Hsiao et al., 2025).                                      | Assists in fault diagnosis, process optimization, and incident prediction.                | Enhances transparency of automated triage and public health diagnostics.                                                         | Advantage: Builds user trust and facilitates human-AI collaboration (Rivas and Abrao, 2020).<br>Limitation: Trade-off between interpretability and model performance.                                             |

Table 4 (continued).

| Technology                                            | Environmental & Natural Hazards                                                                       | Industrial & Infrastructure Emergencies                                                            | Public Health & Social Safety                                                                   | Cross-domain Insights                                                                                                                                                                       |
|-------------------------------------------------------|-------------------------------------------------------------------------------------------------------|----------------------------------------------------------------------------------------------------|-------------------------------------------------------------------------------------------------|---------------------------------------------------------------------------------------------------------------------------------------------------------------------------------------------|
| Digital Twin Technology                               | Simulates disaster evolution and resource deployment for preparedness and recovery (Li et al., 2024). | Mirrors industrial systems to predict failures and optimize maintenance.                           | Models hospital or urban systems for real-time health and mobility management.                  | <p>Advantage: Enables virtual testing and proactive control.</p> <p>Limitation: Requires high-quality, continuous data and significant computational resources (Bongomin et al., 2025).</p> |
| Next-generation Communication (5G/6G, Edge Computing) | Ensures low-latency data transmission for drone coordination and early warning dissemination.         | Supports ultra-reliable communication for critical infrastructure operations (Dixit et al., 2022). | Enables telemedicine, emergency alerts, and high-volume health data transfer (Su et al., 2021). | <p>Advantage: Provides reliable, real-time connectivity under extreme conditions.</p> <p>Limitation: High deployment cost and uneven global coverage (Uusitalo et al., 2021).</p>           |

*17. Section 6.5 can also benefit from my previous comments of structure and flow.*

**Response:**

We sincerely thank the Referee for this valuable suggestion regarding the structure and narrative flow of Section 6.5. We fully agree that presenting future trends in a fragmented or list-like format can weaken the continuity and synthesis expected in a review article.

In response to this comment, we substantially reorganized Section 6.5 by removing the previous bullet-style and numerically separated structure. Instead of discussing each technological direction as an isolated item, the revised section now presents future ERA development as an interconnected and evolving technological ecosystem.

Specifically, the revised text emphasizes the logical relationships among intelligent sensing, resilient communication, autonomous decision-making, digital twins, and multi-agent collaboration. These technological trajectories are now integrated into a continuous narrative organized around the broader operational flow of future ERA systems, progressing from perception and communication infrastructure to decision-making and coordinated execution.

In addition, we strengthened the synthesis-oriented nature of the discussion by explicitly highlighting common technical bottlenecks, cross-domain integration challenges, and the need for standardized empirical validation. This restructuring improves the overall readability, cohesion, and analytical depth of the section, while maintaining the technical details and literature support required for a comprehensive

review article.

### **Specific revisions are listed below:**

The future development of ERA is likely to converge around several interrelated technological directions, including intelligent sensing, explainable AI-driven decision-making, resilient communication infrastructures, digital-twin-enabled simulation, and collaborative multi-agent systems. These technologies are increasingly forming an integrated emergency-management ecosystem that combines real-time perception, adaptive analysis, autonomous coordination, and continuous feedback optimization. Current studies suggest that this convergence may help address persistent limitations in data fragmentation, communication disruption, decision uncertainty, and interagency coordination inefficiency. However, despite rapid technological progress, much of the existing evidence remains concentrated in simulation environments or prototype systems, highlighting the need for stronger operational validation across real-world emergency scenarios.

Recent advances in intelligent sensing and AI-driven analytics are reshaping how ERA systems perceive and interpret dynamic risk environments. Emerging sensing architectures increasingly integrate MEMS, microwave, optical, and gas sensors to support real-time monitoring of fires, toxic releases, and structural failures (Donta et al., 2023; Nanda et al., 2023; Ortiz-Garcés et al., 2023). At the same time, user-edge computing and distributed processing frameworks improve the prioritization of critical disaster data under resource-constrained conditions (Sun et al., 2025), while blockchain-supported information sharing may reduce transmission delays and enhance interagency data integrity (Habib et al., 2024; Treiblmaier and Rejeb, 2023). Parallel developments in explainable AI and multimodal learning are further expanding the analytical capability of ERA systems (Zhang et al., 2025). Techniques such as Dempster–Shafer Theory

combined with AI reasoning can improve decision-making under uncertainty (Fei et al., 2024), whereas multimodal neural networks integrating natural language processing, computer vision, and social-media analytics enable richer situational awareness from heterogeneous data streams (Su et al., 2021). Generative AI tools may additionally support rapid scenario modeling and knowledge extraction during time-critical emergencies (Maceika et al., 2024). Nevertheless, current evidence indicates that the operational reliability, interpretability, and scalability of these systems remain insufficiently validated, particularly under complex field conditions (Hsiao et al., 2025; Wibowo et al., 2025). Future studies should therefore place greater emphasis on measurable operational indicators, including detection latency, false-alarm rates, decision accuracy, processing efficiency, and human–machine trust performance.

At the infrastructure and coordination level, resilient communication networks, digital twins, and intelligent multi-agent collaboration are expected to become increasingly central to next-generation ERA architectures. Emerging 6G ecosystems integrating terahertz transmission, quantum communication, and Low-Earth-Orbit satellite constellations may significantly improve connectivity resilience in disrupted disaster environments (Aldrees et al., 2025; Liu et al., 2025; Uusitalo et al., 2021). Similarly, Software-Defined Networking and UAV relay systems can dynamically reconstruct damaged communication infrastructures and maintain network continuity during emergencies (Abir et al., 2023). Meanwhile, digital-twin-based platforms are increasingly being explored as dynamic simulation environments capable of supporting predictive analytics, operational optimization, and adaptive strategy adjustment (Ghaffarian, 2025). Their integration with edge and distributed computing may further reduce response latency and improve large-scale coordination efficiency (Zio and Miqueles, 2024; Ariyachandra and Wedawatta, 2023). In parallel, collaborative intelligent entities—including UAV swarms, robotic systems, and AI-assisted agents

—are becoming more prominent in hazardous search-and-rescue, logistics, and medical-support operations (Moosavi et al., 2024; Pillai et al., 2024). Emerging multi-agent coordination and human–machine collaboration frameworks may improve task allocation, operational robustness, and adaptive response capability under uncertain conditions (Mourtzis et al., 2024; Daud et al., 2022). Across these domains, however, interoperability, cybersecurity, uncertainty quantification, and standardized evaluation protocols remain major unresolved challenges. Advancing ERA therefore requires a transition from conceptual and prototype-driven research toward operationally validated, interoperable, and cross-domain deployable systems supported by transparent performance metrics and cumulative empirical evidence.

## **Closing Statement**

We thank the Referee once again for the valuable comments and constructive suggestions provided throughout the review process. We have carefully considered all comments and revised the manuscript accordingly. We hope that the revisions adequately address the Referee's concerns and have improved the clarity, coherence, and overall quality of the manuscript.
